# Supplementary material for: A practical approach to goal-directed echocardiography in the critical care setting
Source: Springer Nature journal article supplement (doi:10.1186/s13054-014-0681-z), 2014-12-01
Supplement: MOESM7 [file 9779972]

Figure 7

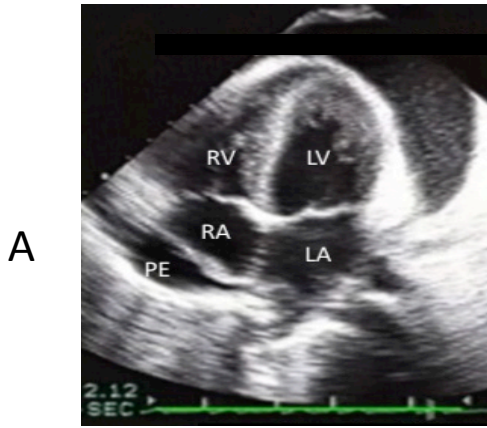

A-4  
Subcostal  
Circumferential Pericardial Effusion

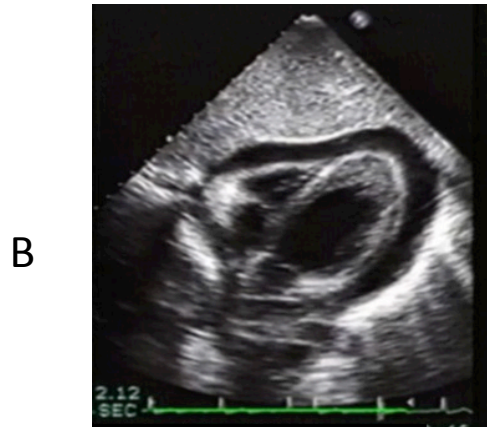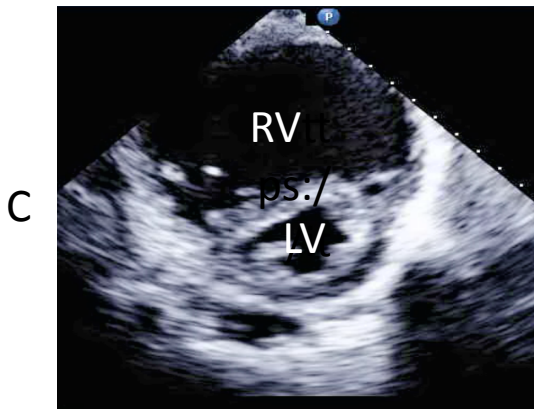

PSAX  
Dilated RV/Septal Flattening

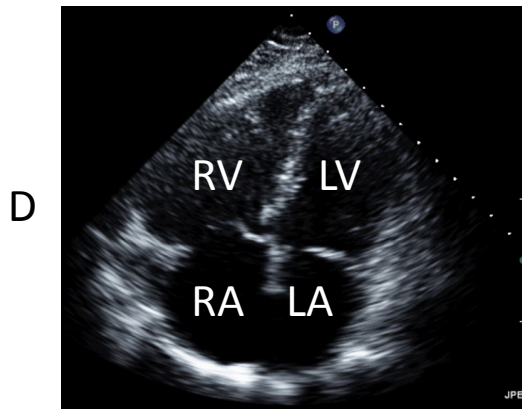

A-4  
Dilated RV/RA

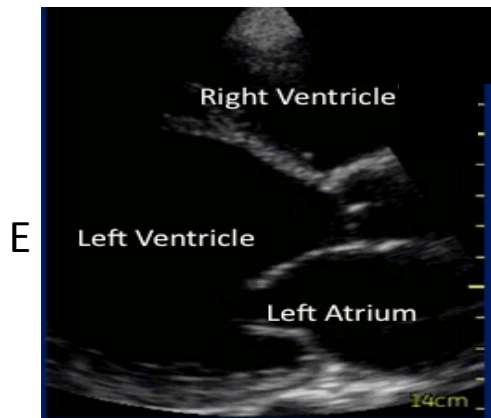

Dilated LV  
PLAX
