# Supplementary figures and images for: A practical approach to goal-directed echocardiography in the critical care setting
Source: Springer Nature journal article supplement (doi:10.1186/s13054-014-0681-z), 2014-12-01

Figure 4

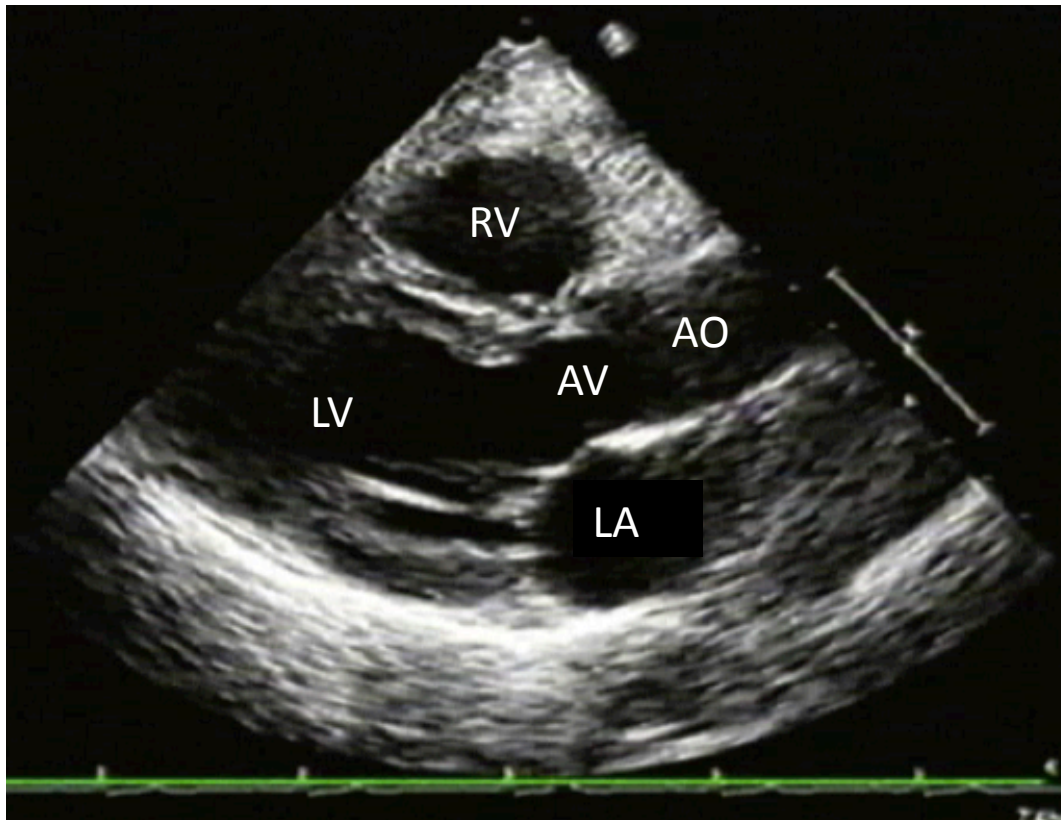

Parasternal Long Axis

Supplement: MOESM4 [file 9779972]

Figure 3

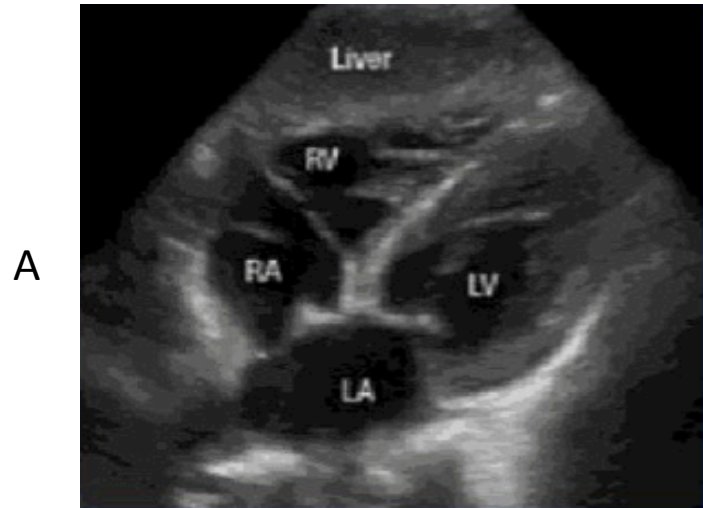

Subcostal 4 Chamber

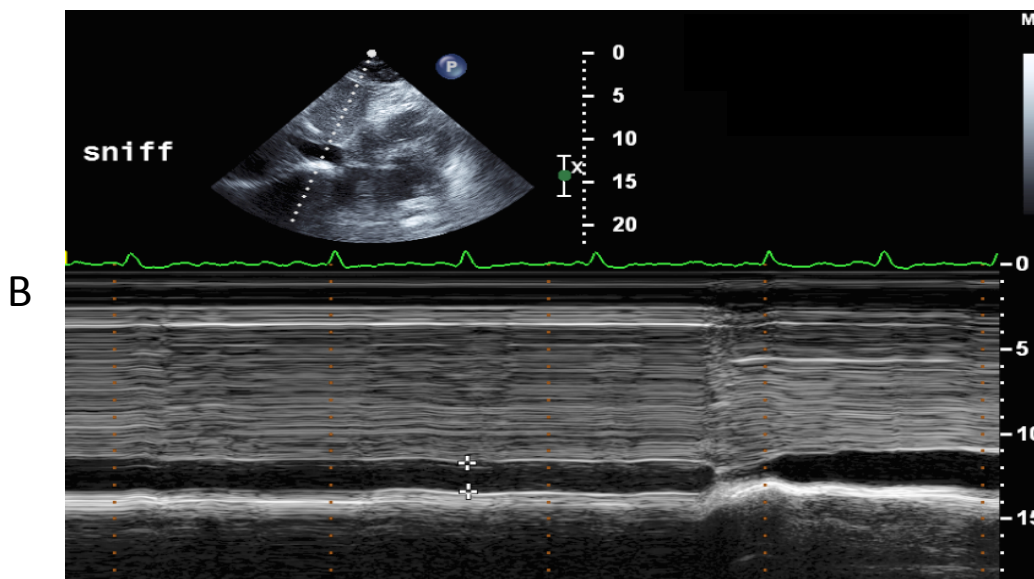

Subcostal Inferior Vena Cava With Sniff

Figure 5  
PSAX

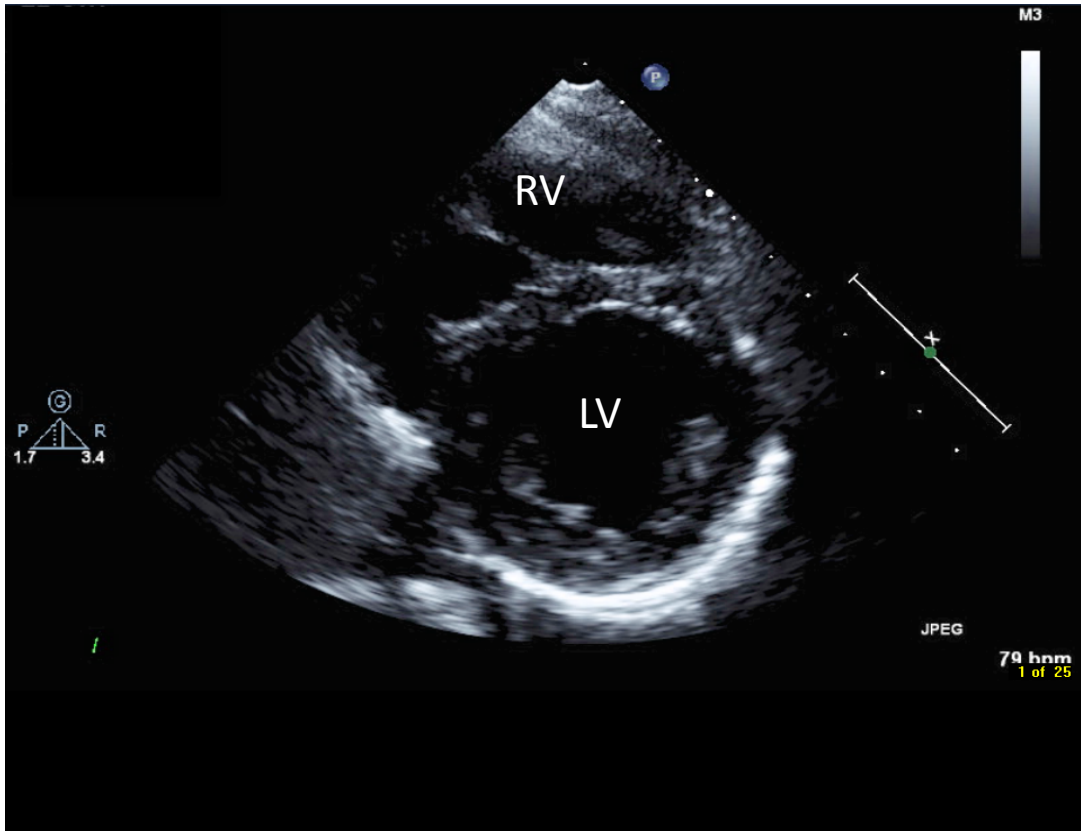

Supplement: MOESM5 [file 9779972]

Figure 6

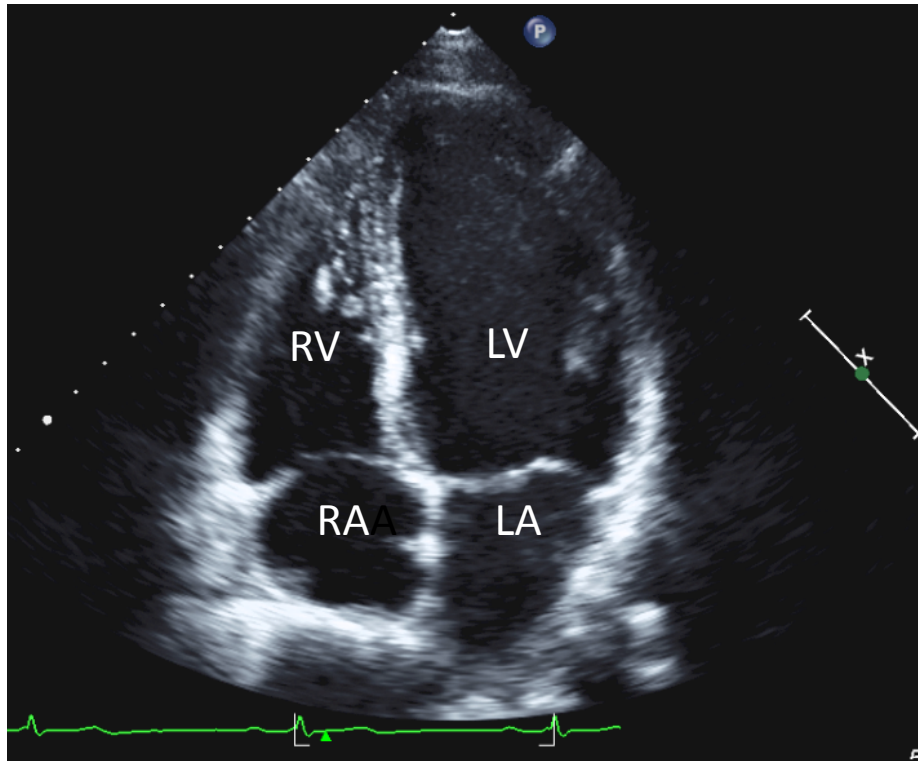

Apical 4 Chamber

Supplement: MOESM6 [file 9779972]
